# Supplementary material for: Discovery of CTCF-Sensitive Cis-Spliced Fusion RNAs between Adjacent Genes in Human Prostate Cells
Source: PubMed Central journal article supplement (PMC4450057; doi:10.1371/journal.pgen.1005001), 2015-02-06
Supplement: pgen.1005001.s002.pdf [file pgen.1005001.s002.pdf]

Pillar-Fill-Colour:

- INTERCHR-DS
- INTERCHR-SS
- INTRACHR-DS
- INTRACHR-SS-RGO
- INTRACHR-SS-OGO-GT3GAP
- INTRACHR-SS-OGO-LE3GAP

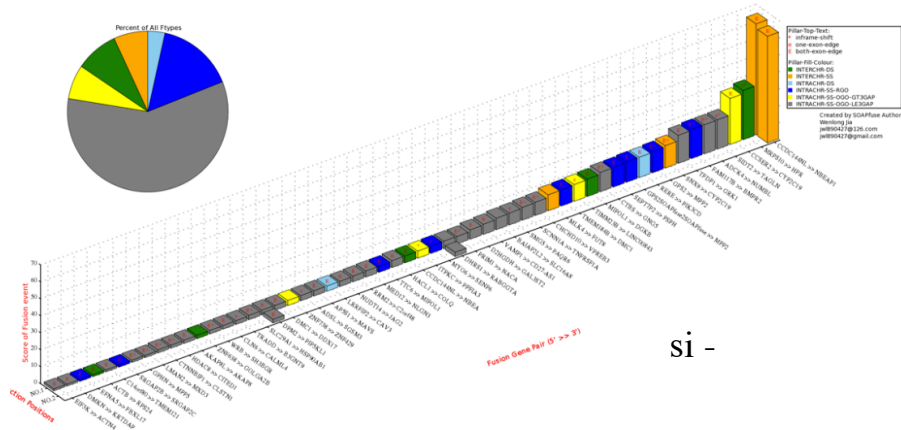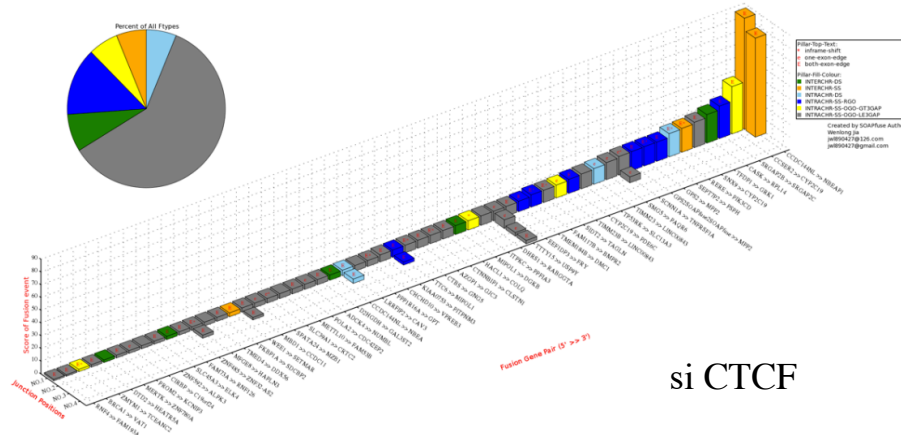

Fig. S2
