# Supplementary material for: Discovery of CTCF-Sensitive Cis-Spliced Fusion RNAs between Adjacent Genes in Human Prostate Cells
Source: PubMed Central journal article supplement (PMC4450057; doi:10.1371/journal.pgen.1005001), 2015-02-06
Supplement: pgen.1005001.s006.pdf [file pgen.1005001.s006.pdf]

A

## TFDP1-GRK1

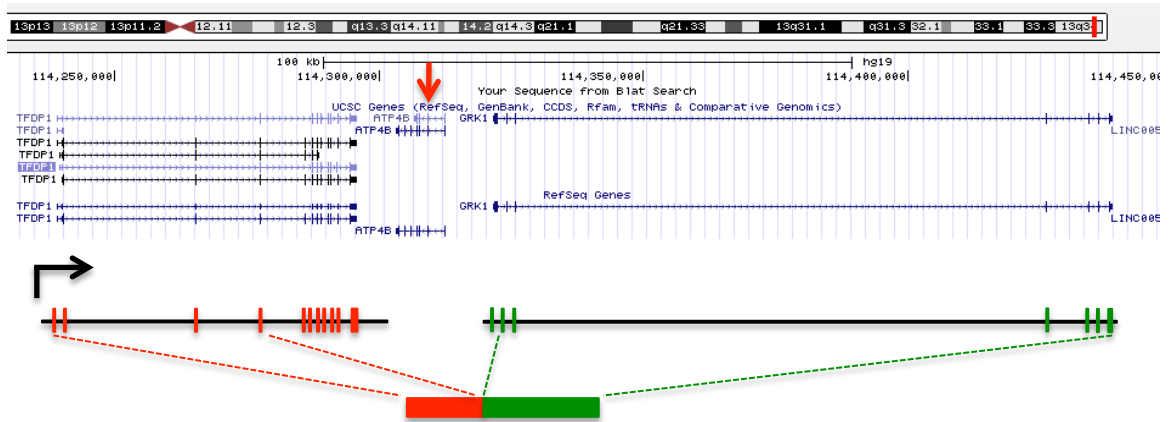

B

## VAMP1-CD27-AS1

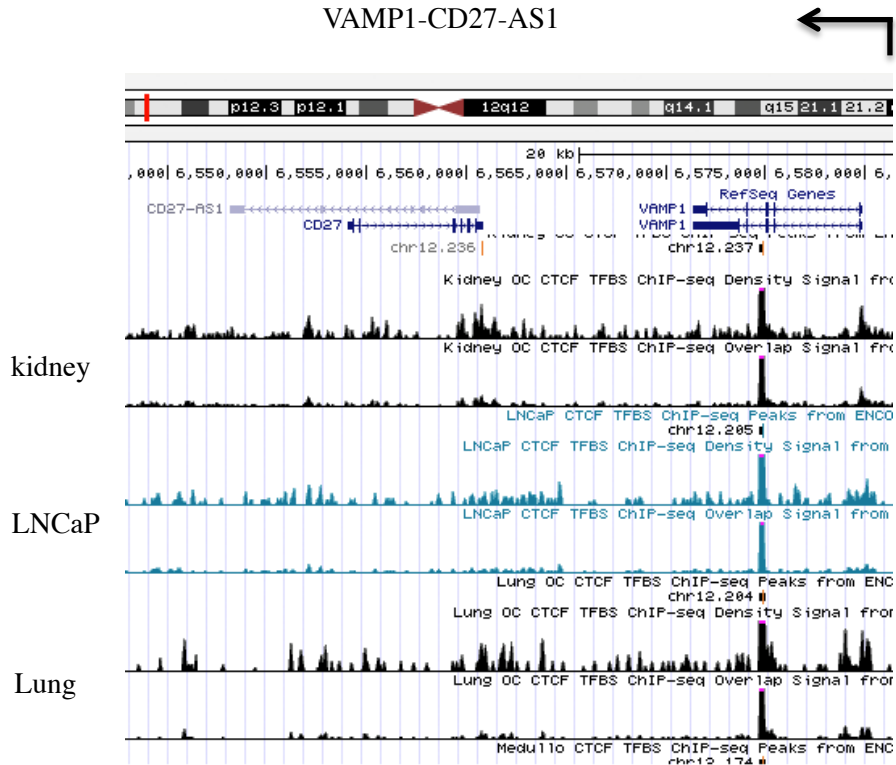

Fig. S6
