# Supplementary material for: Discovery of CTCF-Sensitive Cis-Spliced Fusion RNAs between Adjacent Genes in Human Prostate Cells
Source: PubMed Central journal article supplement (PMC4450057; doi:10.1371/journal.pgen.1005001), 2015-02-06
Supplement: pgen.1005001.s010.pdf [file pgen.1005001.s010.pdf]

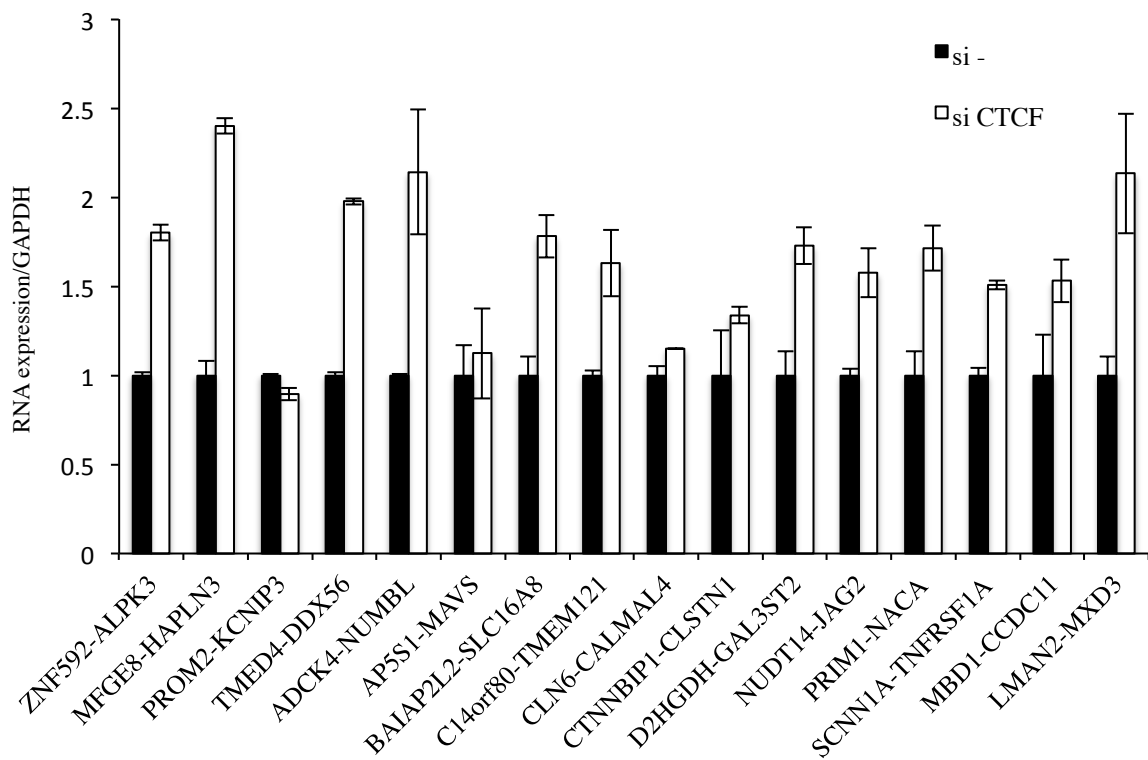

Fig. S10
