# Supplementary material for: Discovery of CTCF-Sensitive Cis-Spliced Fusion RNAs between Adjacent Genes in Human Prostate Cells
Source: PubMed Central journal article supplement (PMC4450057; doi:10.1371/journal.pgen.1005001), 2015-02-06
Supplement: pgen.1005001.s013.pdf [file pgen.1005001.s013.pdf]

**Table S1. Summary of data from RNA-seq**

| experiment  | sample  | Lane  | read length (bp) | No. of reads | Total read bases |
|-------------|---------|-------|------------------|--------------|------------------|
| hudsonalpha | si -    | Lane1 | 50               | 76,717,578   | 7,460,951,100    |
|             |         | Lane2 | 50               | 72,501,444   |                  |
|             | si CTCF | Lane1 | 50               | 70,525,648   | 6,682,500,200    |
|             |         | Lane2 | 50               | 63,124,356   |                  |
| axeq        | si -    | Lane1 | 101              | 33,535,145   | 6,774,099,290    |
|             |         | Lane2 | 101              | 33,535,145   |                  |
|             | Si CTCF | Lane1 | 101              | 31,420,003   | 6,346,840,606    |
|             |         | Lane2 | 101              | 31,420,003   |                  |
