# Supplementary material for: Discovery of CTCF-Sensitive Cis-Spliced Fusion RNAs between Adjacent Genes in Human Prostate Cells
Source: PubMed Central journal article supplement (PMC4450057; doi:10.1371/journal.pgen.1005001), 2015-02-06
Supplement: pgen.1005001.s014.pdf [file pgen.1005001.s014.pdf]

**Table S2. Full list of fusions in si- and siCTCF identified by RNA-seq and SOAPfuse analysis.**

yellow shading stands for the presence of fusions in both samples

| up_gene               | dw_gene | Fusion_Type      |
|-----------------------|---------|------------------|
| ACTB                  | RPS24   | INTERCHR         |
| ADCK4                 | NUMBL   | INTRACHR-SS-0GAP |
| ADSL                  | SGSM3   | INTRACHR-SS-0GAP |
| AKAP8L                | AKAP8   | INTRACHR-SS-0GAP |
| AP5S1                 | MAVS    | INTRACHR-SS-0GAP |
| BAIAP2L2              | SLC16A8 | INTRACHR-SS-0GAP |
| C14orf80              | TMEM121 | INTRACHR-SS-0GAP |
| CCDC144NL             | NBEA    | INTERCHR         |
| CCDC144NL             | NBEAP1  | INTERCHR         |
| CCDC144NL             | NBEAP1  | INTERCHR         |
| CCSER2                | CYP2C19 | INTRACHR-OTHER   |
| CHCHD10               | VPREB3  | INTRACHR-SS-0GAP |
| CLN6                  | CALML4  | INTRACHR-SS-0GAP |
| CTBS                  | GNG5    | INTRACHR-SS-0GAP |
| CTNNBIP1              | CLSTN1  | INTRACHR-SS-0GAP |
| D2HGDH                | GAL3ST2 | INTRACHR-SS-0GAP |
| DHRS1                 | RABGGTA | INTRACHR-SS-0GAP |
| DHRS1                 | RABGGTA | INTRACHR-SS-0GAP |
| DMC1                  | DDX17   | INTRACHR-SS-0GAP |
| DMKN                  | KRTDAP  | INTRACHR-SS-0GAP |
| DPM2                  | PIP5KL1 | INTRACHR-SS-0GAP |
| DPM2                  | PIP5KL1 | INTRACHR-SS-0GAP |
| EFNA5                 | FBXL17  | INTRACHR-OTHER   |
| EIF3K                 | ACTN4   | INTRACHR-SS-0GAP |
| FAM117B               | BMPR2   | INTRACHR-OTHER   |
| GPHN                  | MPP5    | INTRACHR-OTHER   |
| GPS2                  | MPP2    | INTRACHR-OTHER   |
| GPS2SOAPfuse2SOAPfuse | MPP2    | INTRACHR-OTHER   |

|          |           |                  |
|----------|-----------|------------------|
| HACL1    | COLQ      | INTRACHR-OTHER   |
| HDAC8    | CITED1    | INTRACHR-SS-0GAP |
| ITPKC    | PPFIA3    | INTRACHR-OTHER   |
| LMAN2    | MXD3      | INTRACHR-SS-0GAP |
| LRRFIP2  | CAV3      | INTRACHR-OTHER   |
| MED12    | NLGN3     | INTRACHR-SS-0GAP |
| MIPOL1   | DGKB      | INTERCHR         |
| MLK4     | FUT8      | INTERCHR         |
| MRPS10   | HPR       | INTERCHR         |
| MYO6     | SENP6     | INTRACHR-OTHER   |
| NUDT14   | JAG2      | INTRACHR-SS-0GAP |
| PRIM1    | NACA      | INTRACHR-SS-0GAP |
| RERE     | PIK3CD    | INTRACHR-OTHER   |
| RRM2     | C2orf48   | INTRACHR-SS-0GAP |
| SCNN1A   | TNFRSF1A  | INTRACHR-SS-0GAP |
| SEPT7P2  | PSPH      | INTRACHR-OTHER   |
| SIDT2    | TAGLN     | INTRACHR-SS-0GAP |
| SLC29A1  | HSP90AB1  | INTRACHR-SS-0GAP |
| SMG5     | PAQR6     | INTRACHR-SS-0GAP |
| SNX9     | CYP2C19   | INTERCHR         |
| SRGAP2B  | SRGAP2C   | INTRACHR-OTHER   |
| TFDP1    | GRK1      | INTRACHR-SS-0GAP |
| TIMM23B  | LINC00843 | INTRACHR-OTHER   |
| TMEM184B | DMC1      | INTRACHR-OTHER   |
| TRADD    | B3GNT9    | INTRACHR-SS-0GAP |
| TTC6     | MIPOL1    | INTRACHR-OTHER   |
| VAMP1    | CD27-AS1  | INTRACHR-SS-0GAP |
| WRB      | SH3BGR    | INTRACHR-SS-0GAP |
| ZNF638   | GOLGA2B   | INTERCHR         |
| ZNF738   | ZNF429    | INTRACHR-OTHER   |

siCTCF

|       |       |                  |
|-------|-------|------------------|
| ADCK4 | NUMBL | INTRACHR-SS-0GAP |
| AZGP1 | GJC3  | INTRACHR-SS-0GAP |
| BRCA1 | VAT1  | INTRACHR-SS-0GAP |

|                       |          |                  |
|-----------------------|----------|------------------|
| CASK                  | RPL14    | INTERCHR         |
| CCDC144NL             | NBEA     | INTERCHR         |
| CCDC144NL             | NBEAP1   | INTERCHR         |
| CCDC144NL             | NBEAP1   | INTERCHR         |
| CCSER2                | CYP2C19  | INTRACHR-OTHER   |
| CHCHD10               | VPREB3   | INTRACHR-SS-0GAP |
| CIRBP                 | C19orf24 | INTRACHR-SS-0GAP |
| CTBS                  | GNG5     | INTRACHR-SS-0GAP |
| CTNNBIP1              | CLSTN1   | INTRACHR-SS-0GAP |
| CYP2C19               | PDE6C    | INTRACHR-OTHER   |
| D2HGDH                | GAL3ST2  | INTRACHR-SS-0GAP |
| DHRS1                 | RABGGTA  | INTRACHR-SS-0GAP |
| DTD2                  | HEATR5A  | INTRACHR-SS-0GAP |
| EEF1DP3               | FRY      | INTRACHR-OTHER   |
| FAM117B               | BMPR2    | INTRACHR-OTHER   |
| FAM73A                | RNF126   | INTERCHR         |
| FKBP1A                | SDCBP2   | INTRACHR-OTHER   |
| GPS2                  | MPP2     | INTRACHR-OTHER   |
| GPS2SOAPfuse2SOAPfuse | MPP2     | INTRACHR-OTHER   |
| HACL1                 | COLQ     | INTRACHR-OTHER   |
| ITPKC                 | PPFIA3   | INTRACHR-OTHER   |
| KIAA0753              | PITPNM3  | INTRACHR-SS-0GAP |
| LRRFIP2               | CAV3     | INTRACHR-OTHER   |
| LRRFIP2               | CAV3     | INTRACHR-OTHER   |
| MBD1                  | CCDC11   | INTRACHR-SS-0GAP |
| MBD1                  | CCDC11   | INTRACHR-SS-0GAP |
| MERTK                 | ZNF780A  | INTERCHR         |
| METTL10               | FAM53B   | INTRACHR-SS-0GAP |
| MFGE8                 | HAPLN3   | INTRACHR-SS-0GAP |
| MFGE8                 | HAPLN3   | INTRACHR-SS-0GAP |
| MIPOL1                | DGKB     | INTERCHR         |
| POLA2                 | CDC42EP2 | INTRACHR-SS-0GAP |
| PPP1R16A              | GPT      | INTRACHR-SS-0GAP |
| PROM2                 | KCNIP3   | INTRACHR-SS-0GAP |

|          |           |                  |
|----------|-----------|------------------|
| RERE     | PIK3CD    | INTRACHR-OTHER   |
| RNF4     | FAM193A   | INTRACHR-SS-0GAP |
| SCNN1A   | TNFRSF1A  | INTRACHR-SS-0GAP |
| SCNN1A   | TNFRSF1A  | INTRACHR-SS-0GAP |
| SEPT7P2  | PSPH      | INTRACHR-OTHER   |
| SIDT2    | TAGLN     | INTRACHR-SS-0GAP |
| SLC39A1  | CRTC2     | INTRACHR-SS-0GAP |
| SLC45A3  | ELK4      | INTRACHR-SS-0GAP |
| SMG5     | PAQR6     | INTRACHR-SS-0GAP |
| SNX9     | CYP2C19   | INTERCHR         |
| SPATA24  | MZB1      | INTRACHR-OTHER   |
| SRGAP2B  | SRGAP2C   | INTRACHR-OTHER   |
| TFDP1    | GRK1      | INTRACHR-SS-0GAP |
| TIMM23   | LINC00843 | INTRACHR-OTHER   |
| TIMM23B  | LINC00843 | INTRACHR-OTHER   |
| TMED4    | DDX56     | INTRACHR-SS-0GAP |
| TMEM184B | DMC1      | INTRACHR-OTHER   |
| TP53RK   | SLC13A3   | INTRACHR-SS-0GAP |
| TTC6     | MIPOL1    | INTRACHR-OTHER   |
| TTC6     | MIPOL1    | INTRACHR-OTHER   |
| TTY15    | USP9Y     | INTRACHR-SS-0GAP |
| TTY15    | USP9Y     | INTRACHR-SS-0GAP |
| TTY15    | USP9Y     | INTRACHR-SS-0GAP |
| TTY15    | USP9Y     | INTRACHR-SS-0GAP |
| WEE1     | SETMAR    | INTERCHR         |
| ZMYM1    | TCEANC2   | INTRACHR-OTHER   |
| ZNF485   | ZNF32-AS2 | INTRACHR-OTHER   |
| ZNF592   | ALPK3     | INTRACHR-SS-0GAP |
