# Supplementary material for: Discovery of CTCF-Sensitive Cis-Spliced Fusion RNAs between Adjacent Genes in Human Prostate Cells
Source: PubMed Central journal article supplement (PMC4450057; doi:10.1371/journal.pgen.1005001), 2015-02-06
Supplement: pgen.1005001.s015.pdf [file pgen.1005001.s015.pdf]

**Table S3. List of PCR and real-time PCR primers.**

|                  | Chimeric RNA     | Forward primer (5'-3') | Reverse primer (5'-3')   |
|------------------|------------------|------------------------|--------------------------|
| INTRACHR-SS-OGAP |                  |                        |                          |
| 1                | SLC39A1-CRTC2    | GTCCTGGTGATGGAGCAGAT   | TGTGTATGCCAGTCGCAGTT     |
| 2                | SMG5-PAQR6       | GCTCCTTGAAGCTGCTCAGT   | GGACCTGGTGGACTTGAAGA     |
| 3                | METTL10-FAM53B   | AGTTCAGCTTTGGAGGCAGA   | TGGCCAAATGTGGTCAACT      |
| 4                | TFDP1-GRK1       | GAAGCCAACGGAGAACTCAA   | GAATCTTCTTCTCCACCATAGCAC |
| 5                | ZNF592-ALPK3     | CAGAGCCACATACCTCAGCA   | CTGAGCAATGATGGAGCAGA     |
| 6                | MFGE8-HAPLN3     | AGCTACGGTAACGATCAGTGG  | GTTGGCGCTGTTGGAGTAGT     |
| 7                | KIAA0753-PITPNM3 | TGAGCAGTACCTTCGGATCAT  | TTCAGCCATCTCCTCTCTGG     |
| 8                | CIRBP-C19orf24   | ACCTGGAACAAGAGCTGGAG   | CTGGCTCAGCATCATCTCA      |
| 9                | PROM2-KCNIP3     | AGGAGACTCAGCTCTTCCACA  | GTGACAGGAGAGAAGGCACA     |
| 10               | TP53RK-SLC13A3   | TCCGTGCTGTTCTCGTGATA   | TTGGACCTTAGTGCCACTTC     |
| 11               | LINC00680-GUSBP4 | AGCGAAGTGACAGGCTCAGA   | TGGTGTGAGCAATCACCAT      |
| 12               | TMED4-DDX56      | GAGGCCAAGAAGCTGGTGTA   | AAGTGGTGCCATGTGAGAGC     |
| 13               | PPP1R16A-GPT     | CCGACCTGAACGCCAAAGT    | CCTGTGGACAGGAAGACGTT     |
| 14               | TTY15-USP9Y      | TTGACGTATGGAGCCAAGAA   | GCTGTGTTCCCTCCTACTG      |
| 15               | ADCK4-NUMBL      | TGTGTCCTGCAGAAGTCCAG   | GGCTCTGCCGTAACCTGTTC     |
| 16               | ADSL-SGSM3       | CCAGGTTGATGCCTACTTCAG  | TAGAGCTGGAAGGCTCCTCA     |
| 17               | AKAP8L-AKAP8     | CCAGAAGCATCTGAAGACCA   | TAGCTGTAGGTTGCGCCTGT     |
| 18               | AP5S1-MAVS       | TCTTCGGTGCTGAGAAGTCA   | TGCTCAGATTCTGGAGAGAGG    |
| 19               | BAIAP2L2-SLC16A8 | AACAGCAGCAGATCCAAGAA   | CCTCTGAAGGACAACTGCTG     |
| 20               | C14orf80-TMEM121 | GCGCTCTGAGCTGGTCTTCT   | ATCACCAGCGTGGTCAGG       |
| 21               | CHCHD10-VPREB3   | CTGGACTGTTCCACCACTCA   | GCAGGAGAGTTGAGCCACTT     |
| 22               | CLN6-CALML4      | TTCCACCTCGACCTCTGGTT   | CCACCATCAACATGGCTAGA     |
| 23               | CTBS-GNG5        | CTTGTAGTGACGCTGCAGGA   | GAAGATACTCCAGTCAGCAGAGG  |
| 24               | CTNNBIP1-CLSTN1  | ATTCAGCAGAAGGTCCGAGT   | TGTGACTATGCCGTGGTAGG     |
| 25               | D2HGDH-GAL3ST2   | ACGACATCGTACTGACCTG    | CTCTAAGTCCGAGTGCAGGAA    |
| 26               | DHRS1-RABGGTA    | GCAGACAGAAGTCTGAAGG    | GAGGAGAGAAGTGTAATCACG    |
| 27               | DMC1-DDX17       | GAGAGCTCAGAATTGCCAAGA  | TCATATGGTGTGAGCCTTGC     |

|    |                  |                         |                        |
|----|------------------|-------------------------|------------------------|
| 28 | DMKN-KRTDAP      | TCACCTTCTTCCTCGGCTTC    | CCAGTTCAGGAACTCATCAGC  |
| 29 | DPM2-PIP5KL1     | CTCCTGCTGCTCCTGTTTGT    | TCTTGGAGGTGCTGAGGAAC   |
| 30 | EIF3K-ACTN4      | AACATGGACCTCTTGAAGG     | CAATGTTCTCGATCTGTGTGC  |
| 31 | HDAC8-CITED1     | GGTCCTGATTATGTGCTGGAA   | TTCAGAGCCTTGGCAGAAGT   |
| 32 | LMAN2-MXD3       | AAGCTGTTCCAGCTGATGGT    | CTTCTTCTCCTGTGGATGG    |
| 33 | MED12-NLGN3      | CCGGCAACTTCAACAACAG     | GGCCCACTGACTTGAACCT    |
| 34 | NUDT14-JAG2      | AGGAAGTGGCTTGAAGGAG     | GATCAGCAGCTCCTCATTCCG  |
| 35 | PRIM1-NACA       | GAGGAGAATGAAGCTGAATCTG  | TCCTGTTCTTCAAGCTCTGGT  |
| 36 | RRM2-C2orf48     | GACAGACTTATGCTGGAACTGG  | TCAAGACGTAAGGCTGGTCA   |
| 37 | SCNN1A-TNFRSF1A  | GGAGTGGCCAAAGTCAACAT    | GGTGAGGGACCAGTCCAATA   |
| 38 | SIDT2-TAGLN      | TCGCGCTCTTCTTCTTCTTC    | GCCATAGGAAGGACCCTTGT   |
| 39 | SLC29A1-HSP90AB1 | TGTTGAGGTCAAGTCCAGCA    | CTCTCCATGGTGCACCTTCT   |
| 40 | TRADD-B3GNT9     | GGGACCCTGAAACTCCACTT    | CTTGCGTTGTTCTCCTCCTC   |
| 41 | VAMP1-CD27-AS1   | GTGCTGCCAAGCTAAAGAGG    | GCTGAGGCAGGAGAATCACT   |
| 42 | WRB-SH3BGR       | GAAAGCTCGGACAGCTCAAT    | TCCACCTCCTGTTGTCTTCA   |
| 43 | AZGP1-GJC3       | GGTGAAGGAATGGAGGATT     | TCATCTCCAACCTCAGGCATCT |
| 44 | BRCA1-VAT1       | AGCTGTGTGGTGCTTCTGTG    | GTCACCTCTTCTGCCACAT    |
| 45 | DTD2-HEATR5A     | GAGGACTGGTGATCTACGTGTG  | CATTCTTGCAGCAATCCTC    |
| 46 | MBD1-CCDC11      | GCAGTAGACTGGAGGCTTCTACA | CTTGCAGTCATTGTGCTGGT   |
| 47 | POLA2-CDC42EP2   | ATTCAGCCGAATACTCAAGCA   | TGTCACCGAGGGTTACTTGTC  |
| 48 | RNF4-FAM193A     | AGCAAATTGGCCCTTCCAT     | GTGTAGCGCACTTCTGACCA   |

INTERCHR

|   |                  |                        |                        |
|---|------------------|------------------------|------------------------|
| 1 | ACTB-RPS24       | GGACTTCGAGCAAGAGATGG   | TCCTCTGAAGTAGTCGGTTGG  |
| 2 | CCDC144NL-NBEA   | GGCTGGAGGACTAGAAGGAA   | TGCTCCAGGACAGCTCTAGTT  |
| 3 | CCDC144NL-NBEAP1 | GGCTGGAGGACTAGAAGGAA   | TTGCTCCAAGACAGGTCTAGTT |
| 4 | MIPOL1-DGKB      | AACTTCAACATGCCAGAGAGG  | CACAGGATTATTCCTTGCTTCG |
| 5 | MLK4-FUT8        | GCCGATAATGCATATGTCCAG  | TCTCGATCTCCTGACCTCGT   |
| 6 | MRPS10-HPR       | ACACATCAAGGAGCCAATCTG  | GCCATTGTTCAATTGATCAGC  |
| 7 | SNX9-CYP2C19     | TGATTCTCTCAGCCAGCA     | TTCAGCAGGAGAAGGAGAGC   |
| 8 | ZNF638-GOLGA2B   | CAGCTTCTCAGACGACACA    | GCATGGTGGTCATTGCTCT    |
| 9 | CASK-RPL14       | TGTCCACTAAGCAATCAGAGAA | TACTCGCGCGGTGATCTT     |

|    |               |                      |                      |
|----|---------------|----------------------|----------------------|
| 10 | FAM73A-RNF126 | GAGGTTGCAGTTAGCCGAGA | ACCACAGAAGAGGTCCACCA |
| 11 | MERTK-ZNF780A | CGAAGACTGCCTGGATGAAC | CTATTGCCTGAGAGCACAGC |
| 12 | WEE1-SETMAR   | TCAGTATTGCTGTCCGCTTC | GCATTGTTGATGTTGCGAGT |

INTRACHR-OTHER

|    |                   |                       |                        |
|----|-------------------|-----------------------|------------------------|
| 1  | CCSER2-CYP2C19    | TTCGTCTCACCTTCCGTCCT  | CCAACGACACGTTCAATCTC   |
| 2  | GPHN-MPP5         | TCGCCTCTCTACAGCTTCCT  | CAGACCTAACTCTCGACATGGA |
| 3  | HACL-COLQ         | GCAGAGCCTAGCAGACACAA  | ACCACGCTTCTTCTGATCCA   |
| 4  | ITPKC-PPFIA3      | AGTTCCAGCCTCCAGACTCA  | AGCCGCTTATTGTGGTCATC   |
| 5  | TIMM23B-LINC00843 | ACGAGGTGCAGAAGATGACC  | AGACAGCAGCACACAGAACG   |
| 6  | ZNF738-ZNF429     | TGATGGAGTCTCGCTCTGTC  | GCTGAGGCAGGAGAATCACT   |
| 7  | EEF1DP3-FRY       | ATAGCATGGTGCCAGACACA  | GAACCGGAGGCTTGATGTAA   |
| 8  | FKBP1A-SDCBP2     | TACTAGGCAGAGCCGTGGAA  | CTGAATGGCTTGGTCCACTT   |
| 9  | SPATA24-MZB1      | GCTCTCCAGTGTCAAGAGCA  | TCCTCATCATCCAGTTGTGG   |
| 10 | ZMYM1-TCEANC2     | CGTTTCGCTTCGAAGATTGT  | TCTGGCAAGAGAAGCCACTT   |
| 11 | ZNF485-ZNF32-AS2  | TGTGATGCTGGAGAACTATGG | TGAGGAAGCAGAGGAGACCT   |

INTERGENIC REGION OF 16 CIS-SAGE

|    | Chimeric RNA     | FORWARD PRIMER (5'-3') | REVERSE PRIMER (5'-3') | STRAND_SPECIFIC_OLIGO_FOR_RT |
|----|------------------|------------------------|------------------------|------------------------------|
| 1  | ZNF592-ALPK3     | GAGTGCAATGGCACAATCAT   | ACCAGCCTGGACAATACAGC   | AGACCAGGGAGCCAAAGAAC         |
| 2  | MFGE8-HAPLN3     | CCTTCCTCCTTGCTTCTC     | CCAGCAGGTGGAATCTGAAC   | CAAAGCGGTAAGGGAGGAAC         |
| 3  | PROM2-KCNIP3     | TCTGGTTGAGCAGAGGAAGC   | TTGGTTCAAGTACCTTGGAG   | CCCAAAGGAAAGTGAACAA          |
| 4  | TMED4-DDX56      | CCTCCACCTCCTGAGTTCAA   | ACCTGCGGTCAGGAATTCAA   | GCAACTGCCTGAGAGAGAGG         |
| 5  | ADCK4-NUMBL      | CCACACACACAGTGCCTCTT   | TACGCCAATCCTGTGGGTTT   | AAGAGATGGCCCAGGGGTCT         |
| 6  | AP5S1-MAVS       | TGCTGAGCTCCAGTTCTGT    | GGTCATTCTGTATCCTGCATTG | AGTGTTCCCGAAACTCTTGC         |
| 7  | BAIAP2L2-SLC16A8 | TCAGGAGATGTGAGGCTGGA   | CCTGCCTGTTGTCTCTTGT    | GGGAAACGGAGGTAGGACTC         |
| 8  | C14orf80-TMEM121 | TGGAGGTCCTCACAACACTG   | CAGCTGGCCTTAAGACAGGA   | ACCCCAAAGTCACTGACAGG         |
| 9  | CLN6-CALML4      | GCAGCCTTCCCTCCTTAT     | GCCTCTGTGTGGAAAGTGTG   | GGATAACAAGCTTCGGTGCTC        |
| 10 | CTNNBIP1-CLSTN1  | CAGCAGAGAGCTTGAAACC    | TTTCCTTTGCCTGCTGAAGT   | AGATGGAGAGCCTCAACTCC         |
| 11 | D2HGDH-GAL3ST2   | AGCTCTGCTACTGGGCACAT   | ACGGGCAGAAGCTTGAAA     | CGAAGCCAAGACAGGTGAAT         |
| 12 | NUDT14-JAG2      | CAGCAGGACATTCACAGGAC   | ATCGCACTCTCGTGGTGTCA   | AAATAAGGCAGCGGGAGAG          |
| 13 | PRIM1-NACA       | AATTCCTGCTGGGTGCAGT    | GGTTCAAGTGGCTGGGATTA   | GTCACAGGGAGAACGGTGTT         |

|    |                     |                       |                      |                       |
|----|---------------------|-----------------------|----------------------|-----------------------|
| 14 | SCNN1A-<br>TNFRSF1A | AAGCCCTAACAGCCGATTCT  | GTTTCGTGGAGGAGGTGAGA | CAGCTATGGCCTCTCACTCC  |
| 15 | MBD1-CCDC11         | TTCTGCCATTCTGATGAACC  | ACTCGGGACTTCCTCTTCCA | GTGCGGAGAGATGGAGAAAAG |
| 16 | LMAN2-MXD3          | GCTTGAGCACAAAGACGGAGT | CACCGTGACAGCCAAGTAGA | CCCGAGTGGTCTCAGACTTT  |

20 RANDOMLY SELECTED NEIGHBORING PAIRS

|        |                     |                          |                         |
|--------|---------------------|--------------------------|-------------------------|
| 1      | AGBL2-MTCH2         | CCACCCTGATTCTGCCTAAG     | CAGGAAGCTGACACACTTGC    |
| 2      | GPR108-C3           | AGGAGGACGAGGAGGATGTT     | TCAGCACAGTCTTCTCACTGG   |
| 3      | APLP2-ST14          | GATGCTGAGGAAGAGGCAGT     | GTTGTTGACTGGCAGGAACTC   |
| 4      | BLVRB-SERTAD3       | ACTGCAGGCTGTGACTGATG     | GGCTTGCTGGTAGCTCTGAA    |
| 5      | C19orf18-ZNF256     | AGTCCACGCACCTACTTCCA     | GCATCACATCGTGGTACAGG    |
| 6      | DNAJB11-AHSG        | CAGGAGCGAAGCTATGGAAG     | GGTGGTTTCCAGGGTGTCTA    |
| 7      | FAM179B-PRPF39      | CATCTATGCGGCTGCTACAA     | TGCCTGTGCTGCCATTACTA    |
| 8      | KLK3-KLK2           | CCAAGTTCATGCTGTGTGCT     | GGGAATGCTTCTCACACTCC    |
| 9      | MUL1-CAMK2N1        | CACAAGATGGTGTGGAATCG     | GGTGCCTTGTCGGTCATATT    |
| 10     | PAK1IP1-TMEM14C     | AGGCTGACGTGTCTTGGAGT     | ACTGAGCCAGTGCCTGCAT     |
| 11     | RNF213-ENDOV        | TGCTAGAGCTGCACGAAATG     | CTTTCACGAAGGACACGTCA    |
| 12     | SLC25A44-PMF1       | CCTCCATCCTCACCAATCC      | GCTGCAACTGGTAGAAGCACT   |
| 13     | SLC44A4-NEU1        | ACACGCTCTTCTCTGCTTC      | ACAGCAGTTGCTCCATGGTC    |
| 14     | TMEM107-VAMP2       | TCTTCATATTCGAGCGTTGG     | GTCTGCTGCAGTCTCCTGTT    |
| 15     | TXNDC12-RAB3B       | TTATGTCAGTGCCGAGCAAG     | ATCAGCATAGCGGAAGAGGA    |
| 16     | UXT-ELK1            | CAACAGCCTCACCAAGGACT     | ACTGCCACAGCGTCACAGAT    |
| 17     | ZNF383-LOC101927667 | TGGTTGGCAGAGAGCTTACA     | GCTCCTAATGATCTTGAGAGGTG |
| 18     | DERL2-DHX33         | CCAATCAACCTGGTGAATAAG    | TCCTGGTGTCTTCTGAGGTG    |
| 19     | FHL3-SF3A3          | CCCTACTGTGTGGCCTGTTT     | GAGTGCGGTGATCAGAATTG    |
| 20     | DDX5-POLG2          | CCCAAGTTGCTTCAGTTGGT     | TCTGAGCAAGGCCATAAGGT    |
| Others | MALAT1              | GACGGAGGTTGAGATGAAGC     | ATTCGGGGCTCTGTAGTCCT    |
|        | ADCK4               | ACAGAGACTGTGTCCTGCAGAAGT | AGGATCATCACTGCCTCCAC    |
|        | NUMBL               | ACCGCAGCAGCAGCAGTC       | GGCTCTGCCGTAACCTGTTC    |
